# Supplementary material for: Prediction of “Aggregation-Prone” Peptides with Hybrid Classification Approach
Source: Hindawi journal article supplement (doi:10.1155/2015/857325), 2015-01-01
Supplement: f1 [file 857325.f1.pdf]

| protein         | Experimental regions | AMYPRED hits                                                   | AMYPRED2 hits                                                                  | Aggre_Easy hits                                                                                                                                                      | Aggre_Balance hits                                                                                                                              |
|-----------------|----------------------|----------------------------------------------------------------|--------------------------------------------------------------------------------|----------------------------------------------------------------------------------------------------------------------------------------------------------------------|-------------------------------------------------------------------------------------------------------------------------------------------------|
| P01236 [29-227] | 7-21, 20-34, 43-57   | <b>11-16, 18-31</b> , 80-89, 95-100, 130-136, 167-176, 186-195 | <b>11-16, 20-32, 51-55</b> , 80-89, 95-101, 114-117, 129-137, 167-173, 187-195 | <b>9-17 , 25-34, 46-57</b><br>37-39, 58-59, 73-77, 84-87, 97-102, 126-127, 132-136, 181-182, 191-198                                                                 | <b>9-15, 25-33, 47-53, 55-57</b><br>37-38, 58-59, 73-76, 84-87, 97-100, 133-136, 170-174, 181-182, 191-198                                      |
| P01258 [85-116] | 15-19, 15-20         | 6-11                                                           | 6-10                                                                           | <b>15-20</b><br>2-3, 11-14, 21-24,                                                                                                                                   | <b>15-20</b><br>1-3, 12-14, 21-24                                                                                                               |
| P02647 [25-267] | 1-93                 | <b>14-22, 53-58, 69-72</b> , 227-232                           | <b>14-22, 53-57</b> , 224-232                                                  | <b>6-11, 14-15, 17-19, 26-36, 45-55, 57-59, 67-75, 85-87</b> ,<br>132-133, 184-185, 230-232, 238-239,                                                                | <b>7-11, 18-19, 26-35, 47-49, 51-55, 64-65, 67-74, 84-86</b> ,<br>132-133, 229-232                                                              |
| P02663 [16-222] | 81-125               | 25-40, <b>86-90, 95-100</b>                                    | 35-39, <b>86-88, 94-101</b> , 180-183, 199-204                                 | <b>81-99, 101-104, 106-117, 119-120, 124-125</b><br>1-2, 14-19, 21-22, 28-30, 45-47, 134-135, 137-138, 159-163, 165-166, 168-171, 177-178, 184-186, 200-203, 205-206 | <b>81-98, 101-102, 106-113, 116-117, 119-120, 122-123</b> ,<br>1-2, 15-20, 71-72, 159-162, 164-165, 169-170, 177-178, 184-185, 201-202, 205-206 |
| P02735 [19-122] | 1-12                 | <b>2-8</b> , 68-70                                             | <b>2-9</b> , 53-55                                                             | <b>1-9</b> ,<br>33-35, 86-88, 103-104                                                                                                                                | <b>1-7</b> ,<br>33-35, 87-88,                                                                                                                   |

|                 |                                                                                           |                                                                                                                                                                                                         |                                                                                                                                                                                                                                        |                                                                                                                                                                                                                                                                                                                                                         |                                                                                                                                                                                                                                                                                                                       |
|-----------------|-------------------------------------------------------------------------------------------|---------------------------------------------------------------------------------------------------------------------------------------------------------------------------------------------------------|----------------------------------------------------------------------------------------------------------------------------------------------------------------------------------------------------------------------------------------|---------------------------------------------------------------------------------------------------------------------------------------------------------------------------------------------------------------------------------------------------------------------------------------------------------------------------------------------------------|-----------------------------------------------------------------------------------------------------------------------------------------------------------------------------------------------------------------------------------------------------------------------------------------------------------------------|
| P02766 [21-147] | 10-20, 105-115                                                                            | <b>11-17,</b> 26-34, 92-96,<br><b>105-111,</b> 118-122                                                                                                                                                  | <b>12-17,</b> 25-34, 92-96,<br><b>105-112, 114-115,</b> 117-123                                                                                                                                                                        | <b>11-18, 113-115</b><br>24-31, 120-125                                                                                                                                                                                                                                                                                                                 | <b>12-18</b><br>29-31, 73-74, 120-122,                                                                                                                                                                                                                                                                                |
| P02788 [20-710] | 538-545                                                                                   | 6-10,19-22,44-48, 91-98,<br>150-155,254-258,266-271,28<br>6-290, 343-351, 381-385,<br>406-410, 434-442, 473-478,<br>504-508, 532-534, <b>542-551,</b><br>569-576, 589-593, 610-615,<br>630-635, 640-644 | 19-22, 45-47, 61-64, 66,<br>92-99, 152-155, 209-211,<br>254-257, 267-271, 286-290,<br>301-302, 305, 322-329,<br>343-351, 381-385, 406-408,<br>410, 434-441, 473-478,<br>504-508, <b>542-553,</b> 569-576,<br>611-614, 630-635, 667-672 | <b>541-544</b><br>3-6, 8-10, 22-26, 59-62,<br>96-109, 165-166, 168-169,<br>182-186, 205-210, , 252-253,<br>267-269, 286-289, 304-305,<br>318-322, 329-330, 347-348,<br>367-368, 397-398, 405-406,<br>416-419, 437-439, 450-453,<br>476-477, 530-532, 546-548,<br>550-559, 599-600, 610-615,<br>622-624, 633-634, 642-647,<br>657-658, 665-666, 669-671, | <b>541-542,</b><br>5-6, 8-9, 25-26, 60-62,<br>64-65, 96-99, 102-106,<br>167-169, 184-186, 205-206,<br>252-253, 267-269, 285-289,<br>320-321, 329-330, 405-406, ,<br>416-417, 437-439, 450-452,<br>476-478, 531-532, 546-548,<br>550-558, 598-600, 614-615,<br>623-624, 641-644, 646-647,<br>657-658, 665-666, 668-669 |
| P04156 [23-253] | 84-104, 91-105,<br>105-125, 116-122,<br>148-153, 154-163,<br>156-171, 180-196,<br>209-231 | <b>115-119, 152-162, 189-195,</b><br><b>209-214, 218-230</b>                                                                                                                                            | <b>90-104, 115-120, 156-163,</b><br><b>165-170, 187-195, 208-215,</b><br><b>218-231</b>                                                                                                                                                | <b>88-91, 93-96, 98-99,</b><br><b>104-111, 113-123, 148-171,</b><br><b>182-196, 209-212, 216-217,</b><br><b>219-231</b><br><br>11-13, 72-76, 131-132,<br>172-179, 197-198                                                                                                                                                                               | <b>86-91, 94-95, 98-99,</b><br><b>104-109, 115-122, 148-161,</b><br><b>163-170, 181-187, 189-195,</b><br><b>210-212, 216-231</b><br><br>73-74, , 176-179, 197-198,                                                                                                                                                    |
| P04279 [24-462] | 1-142                                                                                     | <b>40-48, 100-106,</b> 142-146,<br>412-417                                                                                                                                                              | <b>40-48, 100-105,</b> 199-199,<br>237-241, 411-417                                                                                                                                                                                    | <b>1-5, 10-20, 22-31, 33-36,</b><br><b>38-47, 51-56, 58-67, 70-77,</b><br><b>81-108, 110-119, 121,</b>                                                                                                                                                                                                                                                  | <b>1-3, 13-17, 19-20, 23-27,</b><br><b>37-47, 58-67, 70-73, 81-87,</b><br><b>93-96, 100-108, 110-113,</b><br><b>117-119, 121-123, 125-127,</b>                                                                                                                                                                        |

|                     |                               |                                                                                                                                                                                                                 |                                                                                                                                                                                                    |                                                                                                                                                                                                                                                                                                                                                                                                                                                    |                                                                                                                                                                                                                                                                                                                                                                                   |
|---------------------|-------------------------------|-----------------------------------------------------------------------------------------------------------------------------------------------------------------------------------------------------------------|----------------------------------------------------------------------------------------------------------------------------------------------------------------------------------------------------|----------------------------------------------------------------------------------------------------------------------------------------------------------------------------------------------------------------------------------------------------------------------------------------------------------------------------------------------------------------------------------------------------------------------------------------------------|-----------------------------------------------------------------------------------------------------------------------------------------------------------------------------------------------------------------------------------------------------------------------------------------------------------------------------------------------------------------------------------|
|                     |                               |                                                                                                                                                                                                                 |                                                                                                                                                                                                    | <b>132-141</b><br><br>146-147, 160-161, 170-173,<br>190-193, 197-203, 228-230,<br>240-241, 243-244, 246-248,<br>251-252, 256-258, 288-289,<br>305-307, 318-321, 335-339,<br>349-350, 385-390, , 403-408,<br>411-416, 429-431, 433-434                                                                                                                                                                                                              | <b>132-139</b><br><br>146-147, 171-172, 192-193,<br>197-202, 227-230, 240-242,<br>253-254, 278-279, 288-290,<br>320-321, 363-364, 385-390,<br>405-407, 415-416, 433-434                                                                                                                                                                                                           |
| P05067<br>[672-713] | 11-25, 25-35, 30-40,<br>37-42 | <b>16-21, 29-41</b>                                                                                                                                                                                             | <b>15-22, 29-41</b>                                                                                                                                                                                | <b>11-29, 31-42</b>                                                                                                                                                                                                                                                                                                                                                                                                                                | <b>11-21, 25-28, 31-42</b>                                                                                                                                                                                                                                                                                                                                                        |
| P06396 [28-782]     | 173-230                       | 42-46, 67-72, 83-90,<br>100-106, 128-134, 157-163,<br><b>186-192</b> , 243-247, 303-308,<br>361-366, 445-453, 461-466,<br>480-484, 507-513, 574-580,<br>594-599, 641-645, 652-654,<br>671-676, 679-684, 729-735 | 44-46, 62-63, 66-74,<br>100-108, 128-134, 157-163,<br><b>186-191</b> , 303-308, 379-385,<br>388, 445-453, 460-466,<br>479-484, 538-541, 575-581,<br>594-597, 644-645, 650-655,<br>675-684, 729-734 | <b>173-174, 177-189, 191-209,</b><br><b>215-223, 225-227, 229-230</b><br><br>25-27, 75-77, 79-82, 84-86,<br>102-103, 113-117, 119-122,<br>124-125, 145-146, 148-151,<br>153-156, 158-162, 166-168,<br>231-232, 244-247, 276-278,<br>284-286, 305-309, 313-316,<br>339-341, 349-352, 364-367,<br>427-428, 440-442, 446-447,<br>450-453, 460-465, 469-470,<br>473-474, 493-496, 498-499,<br>510-512, 517-518, 520-521,<br>524-525, 537-543, 561-567, | <b>179-189, 191-209, 215-220,</b><br><b>225-227</b><br><br>62-63, 75-77, 84-86,<br>105-106, 116-117, 120-122,<br>145-146, 149-151, 153-156,<br>245-247, 284-285, 306-309,<br>314-316, 339-341, 350-352,<br>365-367, 427-428, 439-442,<br>449-453, 458-459, 463-465,<br>498-499, 510-512, 538-542,<br>563-566, 605-606, 647-648,<br>650-651, 674-675, 679-682,<br>718-722, 729-731 |

|                 |                                             |                                                       |                                                     |                                                                                                                  |                                                                                                                                                            |
|-----------------|---------------------------------------------|-------------------------------------------------------|-----------------------------------------------------|------------------------------------------------------------------------------------------------------------------|------------------------------------------------------------------------------------------------------------------------------------------------------------|
|                 |                                             |                                                       |                                                     | 604-606, 615-617, 648-653,<br>677-680, 682-684, 717-720,<br>729-731                                              |                                                                                                                                                            |
| P10636 [2-758]  | 589-600, 622-627                            | 298-305, <b>594-595, 623-627</b>                      | 299-307, <b>592-595, 620-627</b> ,<br>709           | <b>590-595, 599-600, 622-626</b><br><br>6-8, 148-150, 270-271,<br>300-301, 322-325, 445-446,<br>706-709, 725-730 | <b>594-598, 622-626</b><br><br>6-8, 129-130, 148-149,<br>270-271, 324-325, 441-442,<br>448-448, 604-605, 640-646,<br>675-676, 685-686, 725-727,<br>729-730 |
| P10997 [34-70]  | 8-20, 14-20, 20-29,<br>21-30, 30-37         | 8-9, <b>13-20, 23-24</b>                              | <b>13-21, 23-28</b>                                 | <b>8-10, 12-37</b>                                                                                               | <b>12-37</b>                                                                                                                                               |
| P11686 [24-58]  | 9-34                                        | 3-8, <b>10-33</b>                                     | <b>12-33</b>                                        | <b>11-31</b>                                                                                                     | <b>13-29</b>                                                                                                                                               |
| P37840 [1-140]  | 35-95(35-44, 49-59,<br>60-68, 69-82, 86-95) | 15-19, <b>36-41, 52-53, 69-78</b>                     | 15-18, <b>36-41, 48-55, 66-79</b> ,<br><b>87-94</b> | <b>33-35, 39-41, 43-44, 48-53</b> ,<br><b>61-76, 83-85, 92-95</b><br><br>1-2, 5-6, 14-16, 96-97                  | <b>34-35, 37-40, 48-53, 64-76</b> ,<br><br>1-2, 4-6, 14-16                                                                                                 |
| P61626 [19-148] | 5-14, 25-34, 56-61                          | 25-33, <b>55-59, 61-65</b> , 76-80,<br>82-84, 107-114 | 25-33, <b>55-62</b> , 107-112                       | <b>11-12, 25-34, 56-61</b><br><br>3-4, 73-76, 86-89, 105-106,<br>115-119, 122-129                                | <b>25-34, 56-61</b><br><br>1-2, 24-24, 36-37, 88-90,<br>116-119, 122-127                                                                                   |
| P61769 [21-119] | 21-31, 33-41, 59-71,                        | <b>21-29, 60-69, 79-83</b>                            | <b>21-30, 60-70, 80-87</b>                          | <b>21-30, 40-41, 59-68, 83-87</b> ,                                                                              | <b>21-31, 33-34, 38-38, 59-68</b> ,                                                                                                                        |

|                            |                                  |                                                                                                  |                                                                                     |                                                                                                                                                             |                                                                                                                  |
|----------------------------|----------------------------------|--------------------------------------------------------------------------------------------------|-------------------------------------------------------------------------------------|-------------------------------------------------------------------------------------------------------------------------------------------------------------|------------------------------------------------------------------------------------------------------------------|
|                            | 83-89, 91-96                     |                                                                                                  |                                                                                     | <b>92-96</b><br>7-9, 18-20, 53-58                                                                                                                           | <b>83-86, 93-95</b><br>7-8, 56-58                                                                                |
| Q08431<br>[268-317]        | 32-41, 42-50                     | 9-13, <b>32-37</b>                                                                               | 9-13, <b>32-38, 43-49</b>                                                           | <b>32-50</b><br>7-10, 17-18, 21-22, 25-26                                                                                                                   | <b>32-40, 42-50</b><br>6-8                                                                                       |
| P16860 [27-134]            | 66-72                            | <b>66-72</b> , 102-105                                                                           | <b>66-72</b> , 102                                                                  | <b>67-70</b><br>59-60, 80-82, 90-91, 96-98                                                                                                                  | <b>67-70</b><br>104-105                                                                                          |
| P02655 [23-101]            | 60-70                            | <b>62-68</b> , 71-75                                                                             | 16-17, <b>62-75</b>                                                                 | <b>61-66, 68-70</b><br>15-16, 33-34, 53-54, 71-73                                                                                                           | <b>61-62</b><br>71-72, 75-76                                                                                     |
| A1E959 [16-279]            | 112-157                          | 17-18, 60-63, <b>112-118</b> ,<br><b>126-127</b> , <b>130-139</b> , 162-169,<br>199-200, 238-241 | 60-62, 64, 68-69, <b>113-118</b> ,<br><b>130-139</b> , 164-169, 199-200,<br>236-245 | <b>113-138, 140-141, 145-146</b> ,<br><b>151-157</b><br>15-17, 20-26, 44-45, 47-48,<br>522, 59-60, 81-82, 166-167,<br>180-181, 183-184, 216-220,<br>238-241 | <b>112-123, 125-138, 145-146</b> ,<br><b>153-157</b><br>15-17, 20-24, 47-48, 59-60,<br>166-167, 181-182, 215-218 |
| P01034 [27-146]            | 98-103                           | 47-51, 56-65, <b>95-105</b>                                                                      | 56-66, <b>96-105</b>                                                                | <b>98-103</b><br>57-58, 63-65, 74-75,<br>96-97, 111-113, 119-120                                                                                            | <b>98-102</b><br>63-64, 119-120                                                                                  |
| P01308 [25-54 /<br>90-110] | Chain B: 11-17<br>Chain A: 13-18 | Chain B: 5-6, <b>14-19</b> , 23-27<br>Chain A: 10-16                                             | Chain B: <b>11-19</b> , 23-27<br>Chain A: 8, <b>10-16</b>                           | Chain B: <b>15-17</b><br>2-8, 23-27                                                                                                                         | <b>Chain B:</b><br>4-5, 7-8, 18-19, 23-27                                                                        |

|                 |                                     |                                                                                                                                                                                    |                                                                                                                                                                                  |                                                                                                                                                                                    |                                                                                                                                                                           |
|-----------------|-------------------------------------|------------------------------------------------------------------------------------------------------------------------------------------------------------------------------------|----------------------------------------------------------------------------------------------------------------------------------------------------------------------------------|------------------------------------------------------------------------------------------------------------------------------------------------------------------------------------|---------------------------------------------------------------------------------------------------------------------------------------------------------------------------|
|                 |                                     |                                                                                                                                                                                    |                                                                                                                                                                                  | Chain A: 12-13,<br>1-4, 20-21                                                                                                                                                      | <b>Chain A:</b><br>12-13, 18-21                                                                                                                                           |
| P02754 [17-178] | 11-20, 101-110,<br>116-126, 146-152 | 1-5, <b>17-24</b> , 39-44, 54-59,<br>93-97, <b>100-107</b> , <b>117-124</b> ,<br><b>145-151</b>                                                                                    | 1-6, <b>17-24</b> , 29-32, 41-42,<br>55-58, 80-81, 83-84, 92-96,<br><b>101-108, 120-124, 145-152</b>                                                                             | <b>11-12, 102-109, 118-125,</b><br><b>147-152</b><br>1-4, 59-62, 89-90                                                                                                             | <b>103-109, 117-123, 146-152</b><br>1-3, 42-43, 59-62, 156-157                                                                                                            |
| P14621 [2-99]   | 16-31, 87-98                        | <b>19-25</b> , 34-39, <b>92-95</b>                                                                                                                                                 | <b>17-24</b> , 33-39, <b>91-95</b>                                                                                                                                               | <b>15-26, 87-88, 92-98</b><br>12-13, 35-39, 46-50, 59-60,<br>77-82, 84-85                                                                                                          | <b>10-25, 92-98</b> , 35-39, 42-43,<br>47-49, 78-82                                                                                                                       |
| P63159 [2-215]  | 12-27                               | <b>14-21</b> , 99-106                                                                                                                                                              | <b>14-21</b> , 34-38, 99-106                                                                                                                                                     | <b>12-19, 21-25</b><br>35-39, 101-105, 121-123,<br>133-135                                                                                                                         | <b>12-22</b><br>36-38, 101-104, 121-123                                                                                                                                   |
| P32081[1-67]    | 1-22, 1-35, 36-67                   | <b>26-32, 47-52</b>                                                                                                                                                                | <b>26-32, 47-52</b>                                                                                                                                                              | <b>1-12,14-21, 25-33, 35-37,</b><br><b>39-42, 44-52, 54, 57-58,</b><br><b>60-62, 64-65, 67</b>                                                                                     | <b>1-1, 6-10, 12-12, 14-20,</b><br><b>26-37, 39-39, 41-42, 46-55,</b><br><b>57-57, 60-62, 64-67</b>                                                                       |
| Q15582 [24-683] | 492-502, 492-509                    | 8-12, 27-31, 54-61, 113-119,<br>142-143, 148-155, 177-181,<br>191-192, 206-210, 212-218,<br>221-225, 252-256, 297-300,<br>340-345, 371-372, 387-392,<br>425-428, 441-447, 466-472, | 8-12, 27-31, 54-61, 80-94,<br>113-119, 138-150, 153,<br>176-179, 185-192, 204-225,<br>254-256, 397-303, 323-327,<br>336-348, 371, 387-391,<br>441-450, 467-472, <b>492-500</b> , | <b>492-495, 497-502, 506-508</b><br>9-11, 22-23, 28-32, 85-87,<br>89-90, 92-97, 115-119,<br>137-145, 153-157, 171-172,<br>174-182, 187-191, 204-211,<br>215-223, 232-233, 241-242, | <b>492-500, 506-507</b><br>9-11, 28-29, 31-32, 84-85,<br>89-90, 92-97, 115-118,<br>137-142, 144-145, 151-152,<br>155-157, 174-182, 188-190,<br>204-208, 215-217, 219-223, |

|                 |               |                                                                                                                                       |                                                                                                                     |                                                                                                                                                                                                                                                                                                         |                                                                                                                                                                                                      |
|-----------------|---------------|---------------------------------------------------------------------------------------------------------------------------------------|---------------------------------------------------------------------------------------------------------------------|---------------------------------------------------------------------------------------------------------------------------------------------------------------------------------------------------------------------------------------------------------------------------------------------------------|------------------------------------------------------------------------------------------------------------------------------------------------------------------------------------------------------|
|                 |               | <b>492-499</b> , 512-518, 545-547, 561-565, 602-609, 628-631                                                                          | 512-518, 544-547, 549-550, 555-565, 581-584, 600-609, 628-631                                                       | 250-255, 269-271, 273-274, 284-289, 299-303, 307-308, 314-315, 322-324, 326-329, 331-334, 338-339, 341-343, 379-382, 384-385, 395-398, 426-427, 431-432, 442-443, 448-449, 462-463, 468-469, 510-511, 516-518, 546-547, 557-559, 562-564, 578-580, 582-586, 600-609, 637-638, 644-645, 652-653, 655-656 | 251-255, 284-285, 301-303, 307-308, 322-324, 327-329, 331-334, 338-339, 342-343, 379-382, 395-398, 408-409, 413-414, 416-417, 436-436, 442-443, 513-518, 558-559, 562-566, 578-586, 600-609, 637-638 |
| P68082[2-154]   | 1-29, 101-118 | <b>10-11, 28-34, 66-73, 102-108, 110-116</b>                                                                                          | <b>10-15, 27-34, 66-75, 101-116</b>                                                                                 | <b>1-17, 23-29, 101-118</b><br>31-32, 67-68                                                                                                                                                                                                                                                             | <b>1-5, 7-17, 23-24, 26-29, 101-103, 105-117</b><br>67-68                                                                                                                                            |
| Q52546 [23-231] | 5-13          | <b>4-13</b> , 53-54, 71-78, 95-102, 116-127, 130-133, 162-167, 178-181, 191-199                                                       | <b>5-12</b> , 35-36, 71-78, 93-98, 109-110, 116-127, 129-133, 191-199                                               | 38-41, 56-58, 64-65, 77-78, 85-89, 117-122, 131-135, 157-159, 161-167, 174-175, 194-198                                                                                                                                                                                                                 | 37-38, 40-41, 77-79, 84-85, 117-121, 131-132, 161-164, 174-175, 189-190, 192-193, 195-197                                                                                                            |
| P05453 [1-685]  | 7-13          | 102-106, 260-267, 278-284, 306-313, 364-371, 400-406, 426-431, 442-446, 490-464, 529-530, 580-591, 593-607, 612-618, 640-646, 653-657 | 260-268, 278-285, 306-313, 363-371, 398-407, 426-436, 440-448, 529-534, 566-571, 578-618, 640-648, 654-654, 672-684 | <b>7-13</b><br>2-6, 16-30, 47-49, 61-63, 72-73, 75-76, 83-84, 91-93, 95-96, 102-112, 127-129, 227-236, 262-263, 267-268, 295-296, 319-320, 355-359,                                                                                                                                                     | <b>7-13</b><br>2-4, 16-29, 47-49, 74-75, 80-81, 83-84, 91-93, 95-96, 102-112, 125-129, 224-225, 227-234, 252-254, 262-264, 267-268, 364-369, 398-400,                                                |

|                |             |                                                                                       |                                                                                                |                                                                                                                                                                                        |                                                                                                                                                           |
|----------------|-------------|---------------------------------------------------------------------------------------|------------------------------------------------------------------------------------------------|----------------------------------------------------------------------------------------------------------------------------------------------------------------------------------------|-----------------------------------------------------------------------------------------------------------------------------------------------------------|
|                |             |                                                                                       |                                                                                                | 363-364, 366-368, 372-374, 382-383, 394-396, 398-406, 414-418, 426-432, 441-446, 475-476, 506-506, 519-520, 529-540, 548-550, 580-584, 596-598, 614-617, 642-644, 666-668, 680-681     | 402-406, 424-425, 427-431, 442-446, 504-506, 522-523, 531-532, 534-539, 548-550, 581-584, 596-597, 614-616, 619-619, 666-668, 680-681                     |
| P23202 [1-354] | 1-89, 10-39 | <b>35-89</b> , 127-133, 136-146, 184-190, 212-219, 231-237, 255-263, 297-303, 311-317 | <b>35-89</b> , 126-147, 183-190, 212-219, 231-236, 255-261, 295-303, 306-314, 316-318, 323-330 | <b>1-14, 16-89</b><br>105-109, 114-115, 117-119, 132-133, 145-147, 149-150, 160-162, 183-192, 211-213, 215-216, 230-233, 235-239, 257-259, 293-294, 314-321, 323-326, 328-329, 333-334 | <b>1-13, 15-80, 82-89</b><br>106-107, 147-150, 183-184, 187-190, 211-216, 228-228, 230-231, 256-259, 294-295, 314-321, 323-326, 328-329                   |
| Q03689 [1-289] | 218-289     | 7-20, 22-28, 41-44, 85-92, 147-151, 178-182, 195-200, <b>220-221, 244-250</b>         | 7-29, 83-93, 195-200, <b>219-224, 242-250, 266-267, 277-280</b>                                | <b>220-226, 228-229, 232-234, 240-247, 250-256, 258-272, 274-281, 283-289</b><br><br>1-2, 4-9, 15-22, 25-27, 29-30, 35-36, 80-81, 107-112, 123-124, 126-129,                           | <b>220-226, 241-247, 253-257, 259-263, 265-269, 271-272, 274-280, 284-289</b><br><br>5-6, 8-9, 20-21, 59-61, 108-112, 123-124, 127-129, 131-133, 161-162, |



|  |  |  |  |                   |  |
|--|--|--|--|-------------------|--|
|  |  |  |  | 131-133, 161-167, |  |
|--|--|--|--|-------------------|--|
